# Supplementary material
Source: PubMed Central journal article supplement (PMC4485990)
Supplement: NIHMS701655-supplement-Text.pdf [file NIHMS701655-supplement-Text.pdf]

## MaxQuant Settings for Quantitation

```
<MaxQuantParams xmlns:xsi="http://www.w3.org/2001/XMLSchema-instance"
xmlns:xsd="http://www.w3.org/2001/XMLSchema" RunOnCluster="false"
ProcessFolder="E:\Proteomics_Files\130418_Andy6_A_FwdRev\combined\proc">
  <ionCountIntensities>false</ionCountIntensities>
  <fixedModifications><string>Carbamidomethyl (C)</string></fixedModifications>
  <fastaFiles><string>E:\FASTAs\YEAST.fasta</string></fastaFiles>
  <fastaFilesFirstSearch />
  <fixedSearchFolder />
  <randomize>false</randomize>
  <specialAas>KR</specialAas>
  <includeContaminants>true</includeContaminants>
  <equalll>true</equalll>
  <topxWindow>100</topxWindow>
  <minTime>NaN</minTime>
  <maxTime>NaN</maxTime>
  <maxPeptideMass>5000</maxPeptideMass>
  <reporterPif>0.75</reporterPif>
  <reporterFraction>0</reporterFraction>
  <slicePeaks>true</slicePeaks>
  <useOriginalPrecursorMz>false</useOriginalPrecursorMz>
  <scoreThreshold>0</scoreThreshold>
  <filterAaccounts>true</filterAaccounts>
  <secondPeptide>true</secondPeptide>
  <matchBetweenRuns>false</matchBetweenRuns>
  <reQuantify>true</reQuantify>
  <calcPeakProperties>false</calcPeakProperties>
  <dependentPeptides>false</dependentPeptides>
  <dependentPeptideFdr>0.01</dependentPeptideFdr>
  <dependentPeptideMassBin>0.0055</dependentPeptideMassBin>
  <labelFree>false</labelFree>
  <ibaq>false</ibaq>
  <msmsRecalibration>false</msmsRecalibration>
  <verboseColumnHeaders>false</verboseColumnHeaders>
  <ibaqLogFit>true</ibaqLogFit>
  <calcSequenceTags>false</calcSequenceTags>
  <deNovoVarMods>true</deNovoVarMods>
  <massDifferenceSearch>false</massDifferenceSearch>
  <minPepLen>5</minPepLen>
  <peptideFdr>0.01</peptideFdr>
  <peptidePep>1</peptidePep>
  <proteinFdr>0.01</proteinFdr>
  <siteFdr>0.01</siteFdr>
  <maxPeptideLengthForUnspecificSearch>25</maxPeptideLengthForUnspecificSearch>
  <useNormRatiosForOccupancy>true</useNormRatiosForOccupancy>
  <minPeptides>1</minPeptides>
  <minRazorPeptides>1</minRazorPeptides>
  <minUniquePeptides>0</minUniquePeptides>
  <useCounterparts>false</useCounterparts>
  <minRatioCount>2</minRatioCount>
  <lfqMinRatioCount>2</lfqMinRatioCount>
  <restrictProteinQuantification>true</restrictProteinQuantification>
  <restrictMods><string>Oxidation (M)</string><string>Acetyl (Protein N-term)</string>
  </restrictMods>
  <matchingTimeWindow>2</matchingTimeWindow>
  <maxFeatureDetectionCores>1</maxFeatureDetectionCores>
  <numberOfCandidatesMultiplexedMsms>50</numberOfCandidatesMultiplexedMsms>
  <numberOfCandidatesMsms>15</numberOfCandidatesMsms>
  <expDesignFileName>E:\Proteomics_Files\130418_Andy6_A_FwdRev\combined\experimentalDesignTemplate.txt</expD
esignFileName>
  <separateAasForSiteFdr>true</separateAasForSiteFdr>
  <massDifferenceMods />
  <tempFolder />
  <ncores>8</ncores>
  <GroupParams>
    <maxLabeledAa>3</maxLabeledAa>
    <maxNmods>5</maxNmods>
    <maxMissedCleavages>2</maxMissedCleavages>
  </GroupParams>
</MaxQuantParams>
```

```

<multiplicity>2</multiplicity>
<protease>Trypsin/P</protease>
<proteaseFirstSearch>Trypsin/P</proteaseFirstSearch>
<useProteaseFirstSearch>>false</useProteaseFirstSearch>
<useVariableModificationsFirstSearch>>false</useVariableModificationsFirstSearch>
<variableModifications>
  <string>Oxidation (M)</string>
  <string>Acetyl (Protein N-term)</string>
</variableModifications>
<maxCharge>7</maxCharge>
<groupIndex>1</groupIndex>
<doMassFiltering>>true</doMassFiltering>
<firstSearchTol>20</firstSearchTol>
<mainSearchTol>6</mainSearchTol>
<labels><string /><string>18O</string></labels>
<lcmsRunType>0</lcmsRunType>
<msInstrument>0</msInstrument>
</GroupParams>
</GroupParams>
<msmsParams>
  <FragmentSpectrumSettings Name="FTMS" InPpm="true" Deisotope="true" Topx="10" HigherCharges="true"
IncludeWater="true" IncludeAmmonia="true" DependentLosses="true">
    <Tolerance><Value>20</Value><Unit>Ppm</Unit>
    </Tolerance>
  </FragmentSpectrumSettings>
</msmsParams>
<keepLowScoresMode>0</keepLowScoresMode>
<msmsCentroidMode>1</msmsCentroidMode>
<quantMode>1</quantMode>
<siteQuantMode>0</siteQuantMode>
</MaxQuantParams>

```

For a detailed explanation of how the MaxQuant algorithm works, please see:

[Cox, J. and Mann, M. \(2008\) MaxQuant enables high peptide identification rates, individualized p.p.b.-range mass accuracies and proteome-wide protein quantification. \*Nat Biotechnol\* 26, 1367-72.\)](#)
